# Supplementary material
Source: PubMed Central journal article supplement (PMC2824284)
Supplement: 0910591107_pnas.200910591SI.pdf [file 0910591107_pnas.200910591SI.pdf]

# Supporting Information

Heck et al. 10.1073/pnas.0910591107

## SI Text

**Strains and Plasmids.** Yeast strains were cultured, as described elsewhere (1), in minimal media with 2% (vol/vol) dextrose and appropriate amino acid supplements at 30°C unless otherwise indicated. The majority of strains used were in the BY4741 background (*MATa ura3Δ0 leu2Δ0 his3Δ1 met15Δ0*), with the exception of *ubc4Δubc5Δ* and WT, MHY508 (*ubc4Δ::HIS3 ubc5Δ::LEU2*), MHY501 (*MATa ura3Δ0 leu2Δ0 his3Δ1 met15Δ0*) with the exception of: *ubc4Δubc5Δ* and WT, MHY508 (*ubc4Δ::HIS3 ubc5Δ::LEU2*), and MHY501 (*MATa his3-Δ200 leu2-3,112 ura3-52 lys2-801 trp1-1*). *SSA1* (JN516; *MATa ura3-52 leu2-3 his3-11, 15 trp1-Δ1 lys2 SSA1 ssa2::LEU2 ssa3::TRP1 ssa4::LYS2*) and *ssa1-45* (JB67; *MATa ura3-52 leu2-3 his3-11, trp1-Δ1 lys2 ssa1::ssa1-45 ssa2::LEU2 ssa3::TRP1 ssa4::LYS2*). Null alleles with coding regions replaced were constructed in the BY4741 background by transforming yeast using the Lithium Acetate method with a PCR product encoding the indicated selection marker and 50-bp flanks homologous to the gene to be disrupted (2) or using knockout cassettes in the laboratory collection. Oligo sequences are available on request.

The *UBR1* (pRH2444), *UBR1MR1* (pRH2445), and *PADH-UBR1* (pRH2471) plasmids were a gift from A. Varshavsky (California Institute of Technology, Pasadena, CA). The original *-CPY<sup>+</sup>-GFP* expression plasmid was provided by D. Wolf (University of Stuttgart, Stuttgart, Germany). The *SAN1* (pRH2475), *SAN1-NLS* (pRH2439), *san1Δ::NatMX* (pRH2376), *PGAL-CPY<sup>+</sup>-GFP* (pRH2533), and *PGALCPY<sup>+</sup>-GFP-NES* (pRH2534) plasmids were a gift from R. Gardner (University of Washington, Seattle, WA).

**Degradation Assays.** Cycloheximide chase degradation assays were performed as previously described (1). Briefly, yeast cells were grown to log phase ( $\sim OD_{600} < 0.5$ ), and cycloheximide was added to a final concentration of 50  $\mu$ M. At the indicated time points, cells were collected by centrifugation and lysed with 0.1 mL of SUME [1% SDS, 8 M urea, 10 mM Mops (pH 6.8), 10 mM EDTA] with protease inhibitors (260  $\mu$ M ABESF, 142  $\mu$ M TPCK, 100  $\mu$ M leupeptin, 76  $\mu$ M pepstatin) and 0.5-mm glass beads, followed by vortexing for 2 min and addition of 100  $\mu$ L of 2 $\times$  USB [75 mM Mops (pH 6.8), 4% (vol/vol) SDS, 200 mM DTT, 0.2 mg/mL bromophenol blue, 8 M urea]. The bead slurry was heated to 80°C for 3 min and then clarified by centrifugation before separation by SDS/PAGE and subsequent immunoblotting with appropriate antibodies.

**Flow Cytometry Analysis.** Flow cytometry for GFP-tagged substrates was performed as described elsewhere (3). Cell cultures were grown in minimal medium to low log phase ( $OD_{600} = 0.1$ ) before addition of 50  $\mu$ M cycloheximide for the indicated times. Samples were measured for fluorescence with a BD Biosciences FACScalibur instrument, and statistical analysis was conducted with CellQuest flow cytometry software. Histograms represent 10,000 individual cells.

**Cytoplasm Preparation.** Cytoplasm for in vitro assays was prepared from the respective genetic backgrounds using an approach modified from our in vitro ERAD assay (4). Cells were grown in yeast peptone dextrose (YPD) to an  $OD_{600}$  of 0.8–1.0, and 100 ODs of cells were pelleted. The pellet was washed twice with H<sub>2</sub>O and once with cold B88 buffer [20 mM Hepes-KOH (pH 7.4), 150 mM KOAc, 250 mM sorbitol, 5 mM Mg(OAc)<sub>2</sub>] with protease inhibitors (260  $\mu$ M ABESF, 142  $\mu$ M TPCK, 100  $\mu$ M leupeptin, 76  $\mu$ M pepstatin) and DTT, and it was resuspended in

100  $\mu$ L of B88 buffer with protease inhibitors and DTT for lysis by grinding in a mortar and pestle. The mortar and pestle were precooled with liquid nitrogen before addition of the cells. The cells were added to the mortar with 5 mL of liquid nitrogen. The frozen cells were ground by hand with the pestle. The cells were kept frozen during the process by addition of liquid nitrogen as needed. The ground cells were then placed in a 2-mL tube on ice and allowed to thaw back to liquid. The resulting cytoplasm was clarified by centrifugation at 5,000  $\times g$  at 4°C for 5 min. The supernatant was then transferred to a different tube and centrifuged again at 20,000  $\times g$  at 4°C for 15 min. A final ultracentrifugation was carried out at 100,000  $\times g$  at 4°C for 60 min. Protein concentration of individual cytoplasms was determined using Bradford Reagent (Sigma-Aldrich). Cytoplasms were kept on ice until use.

**In Vitro Ubiquitination Assay.** Bead-bound immunoprecipitated substrate was mixed with the isolated cytoplasm from the indicated genetic background in the following way: All cytoplasmic reactions took place in a final volume of 30  $\mu$ L and were prepared on ice. One hundred fifty milligrams of total protein from the respective cytoplasmic preparation was mixed with 15 mM ATP and 10  $\mu$ L of FLAG beads bound to pre-IP substrate. The reactions were incubated in a 30°C water bath for 1 h with periodic agitation. The reaction was terminated by adding 800  $\mu$ L of IP buffer (15 mM sodium phosphate, 150 mM NaCl, 10 mM EDTA, 2% (vol/vol) Triton X-100, 0.1% (vol/vol) SDS, 0.5% (vol/vol) deoxycholate) with protease inhibitors and 5 mM N-ethylmaleimide. The FLAG beads were washed three times with 1 mL of IP wash buffer (50 mM NaCl, 10 mM Tris, pH 7.5), aspirated to dryness, and heated in the presence of sample buffer to 100°C for 3 min before SDS/PAGE and immunoblotting. IP of substrate before in vitro ubiquitination experiments was conducted in the following manner. Strains lacking San1 and Ubr1 and containing FLAG-tGND1-GFP were grown as described for the previous cytoplasmic preparation. Ten microliters of anti-FLAG M2 beads (Sigma-Aldrich) was added per 150 mg of cytosol and allowed to nutate overnight at 4°C. The beads were then pelleted in an Eppendorf 5415c microfuge at 1,000 rpm for 1 min. Three washes with IP buffer were conducted before final resuspension in B88 reaction buffer.

**In Vivo Ubiquitination Assay.** Cells were grown and lysed as outlined above. To assess in vivo ubiquitination, 1 mL of IP buffer with protease inhibitors and N-ethylmaleimide was added after vortexing in the presence of beads and SUME. The lysate was clarified by centrifugation in an Eppendorf 5415c microfuge at 14,000 rpm for 5 min. The supernatant was transferred to a different tube, and either polyclonal anti-GFP, anti-HA (Covance), or monoclonal anti-FLAG M2 beads (Sigma-Aldrich) were added depending on the substrate. The lysates were nutated overnight at 4°C. In the case of anti-GFP and anti-HA pulldown, 100  $\mu$ L of protein A Sepharose beads was then added and allowed to nutate for an additional 2 h at 4°C. The beads were then spun down in an Eppendorf 5415c at 1,000 rpm, washed three times with IP wash buffer (50 mM NaCl, 10 mM Tris, pH 7.5), and aspirated to dryness before addition of electrophoretic sample buffer.

**Phenotyping.** To evaluate cell growth, plate dilution assays were carried out by growing all strains in supplemented minimal medium overnight. A total of 0.35 OD units was centrifuged and resuspended in 1 mL of sterile water. Five- or 10-fold dilutions were then performed

PNAS PNAS PNAS PNAS PNAS

1. Gardner R, et al. (1998) Sequence determinants for regulated degradation of yeast 3-hydroxy-3-methylglutaryl-CoA reductase, an integral endoplasmic reticulum membrane protein. *Mol Biol Cell* 9:2611–2626, and correction (1999) 10:precdi.
2. Baudin A, Ozier-Kalogeropoulos O, Denouel A, Lacroste F, Cullin C (1993) A simple and efficient method for direct gene deletion in *Saccharomyces cerevisiae*. *Nucleic Acids Res* 21:3329–3330.

3. Cronin S, Hampton RY (1999) Measuring protein degradation with green fluorescent protein. *Methods Enzymol* 302:58–73.
4. Garza RM, Sato BK, Hampton RY (2009) In vitro analysis of Hrd1p-mediated retrotranslocation of its multispanning membrane substrate 3-hydroxy-3-methylglutaryl (HMG)-CoA reductase. *J Biol Chem* 284:14710–14722.

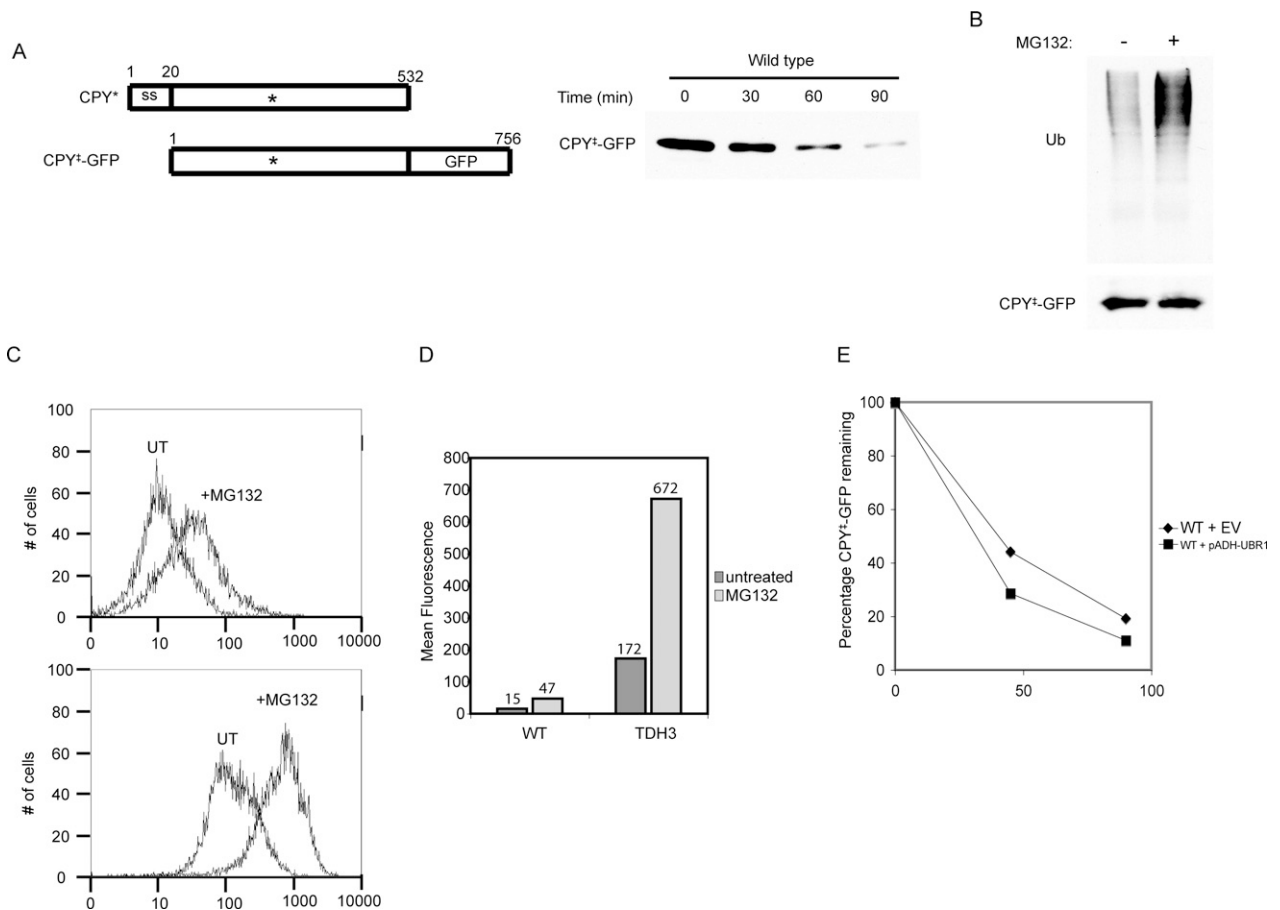Heck et al. [www.pnas.org/cgi/content/short/0910591107](http://www.pnas.org/cgi/content/short/0910591107)

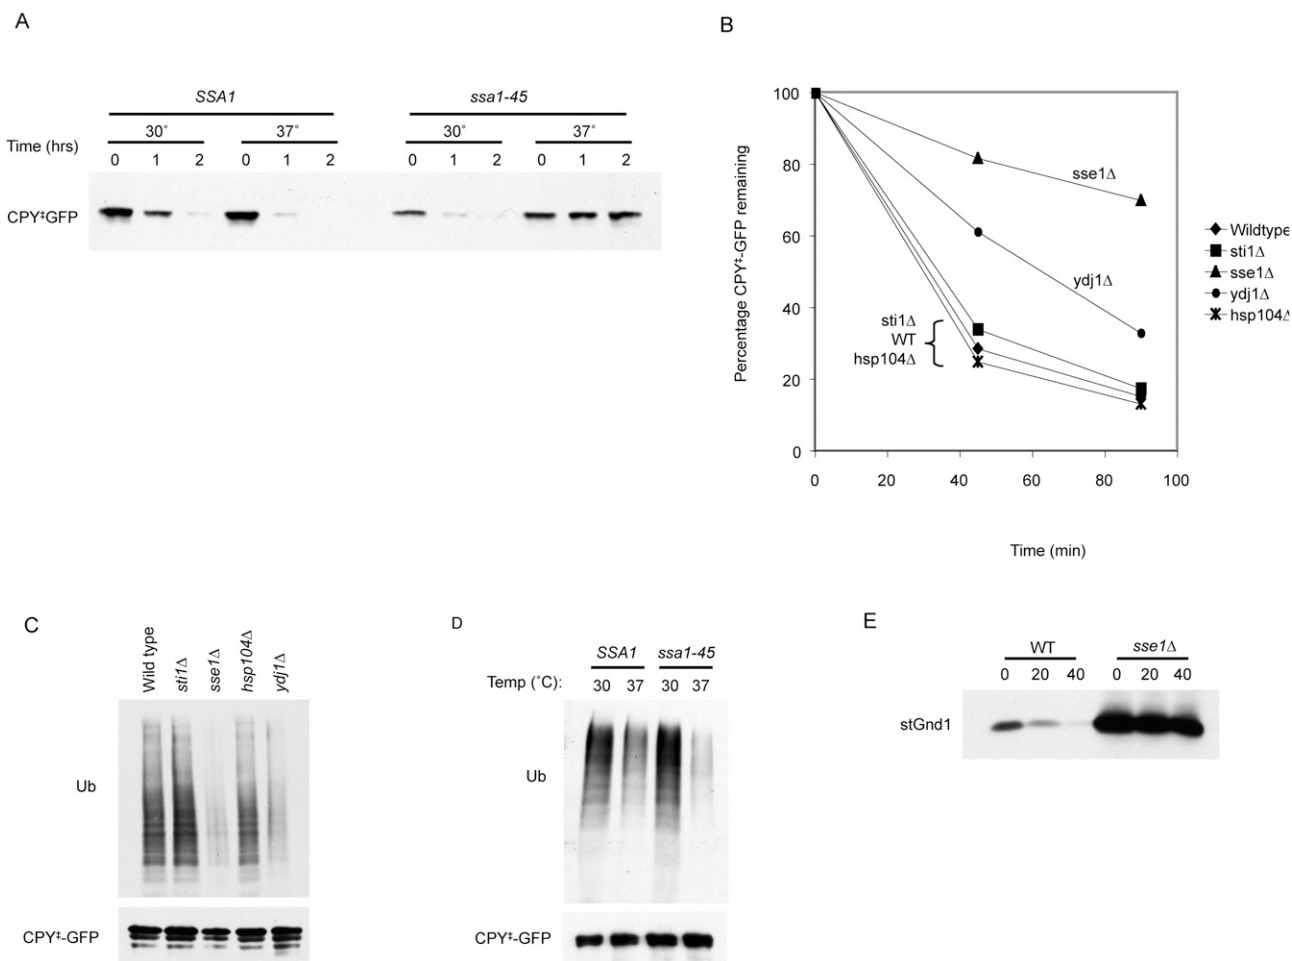

**Fig. S2.** Chaperone-dependent degradation of QC substrates. (A) CPY<sup>+</sup>-GFP degradation in *ssa2Δssa3Δssa4Δ* nulls with either WT *SSA1* or temperature-sensitive *ssa1-45* present, evaluated by cycloheximide chase at 30°C or 37°C, followed by anti-GFP immunoblotting. (B) Flow cytometry analysis of cycloheximide chase of CPY<sup>+</sup>-GFP in chaperone nulls in WT, *sti1Δ*, *sse1Δ*, *ydj1Δ*, and *hsp104Δ*. Mean fluorescence of CPY<sup>+</sup>-GFP at each time point was normalized to the steady state at time 0 and graphed as percentage remaining. (C) In vivo ubiquitination of CPY<sup>+</sup>-GFP expressed in chaperone nulls used in B, IP with anti-GFP, and immunoblot with antiubiquitin (Ub) or anti-GFP. (D) Ubiquitination of CPY<sup>+</sup>-GFP in WT or *ssa1-45* strains used in A, at 30°C or 37°C. Cells were pre-incubated at the indicated temperature for 1 h before lysis and IP. Western blots were probed with anti-Ub or anti-GFP. (E) Cycloheximide chase of stGnd1 in WT and *sse1Δ* null.

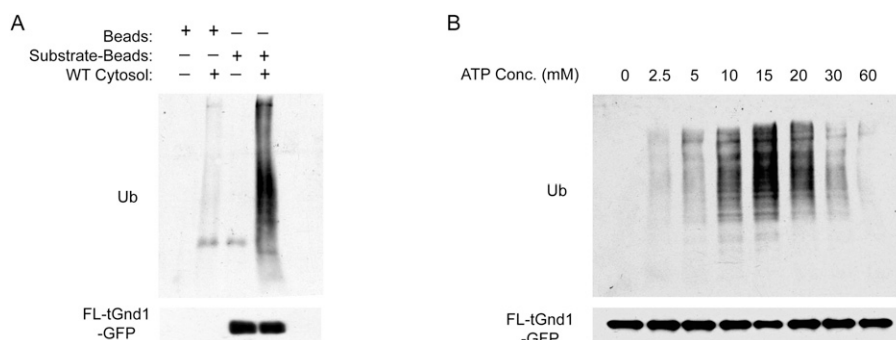

**Fig. S3.** In vitro ubiquitination assay characterization. (A) In vitro ubiquitination of FLAG-tGnd1-GFP. Anti-FLAG agarose beads with bound FLAG-tGnd1-GFP (Substrate-Beads) or untreated anti-FLAG agarose beads (Beads) were incubated with WT cytosol (+) or buffer (-) for 1 h at 30°C. The beads were then washed and resuspended in sample buffer before SDS/PAGE and immunoblotting for ubiquitin (Ub) or GFP. (B) ATP-dependent in vitro ubiquitination. Indicated ATP concentrations were added to 150 mg of total cytosol protein and 10 μL of bead-bound tGnd1-GFP, incubated at 30°C for 1 h, and immunoblotted for Ub or GFP.

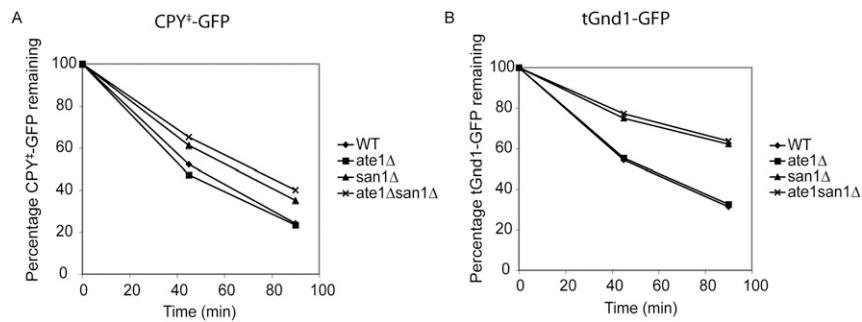

**Fig. S4.** No effect of *ate1*Δ on CPY<sup>+</sup>-GFP or tGnd1-GFP degradation. (A) Flow cytometry analysis of CPY<sup>+</sup>-GFP degradation in WT, *ate1*Δ, *san1*Δ, and *ate1*Δ*san1*Δ nulls. Mean fluorescence of CPY<sup>+</sup>-GFP at each time point was normalized to the steady state at time 0 and graphed as percentage remaining. (B) Flow cytometry analysis of tGnd1-GFP degradation in strains used in A.

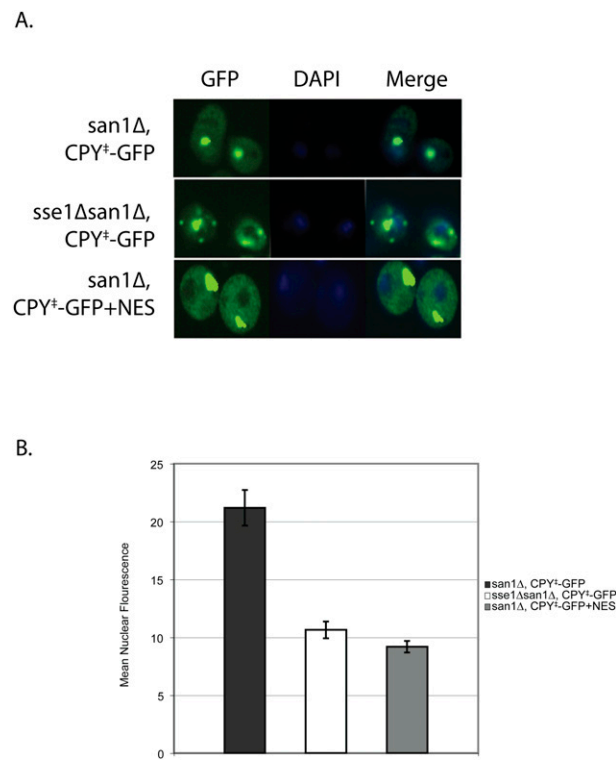

**Fig. S5.** Sse1-mediated nuclear localization of CPY<sup>+</sup>-GFP. (A) Representative images of fluorescence microscopy carried out on *san1*Δ and *sse1*Δ*san1*Δ cells expressing CPY<sup>+</sup>-GFP as well as *san1*Δ cells expressing CPY<sup>+</sup>-GFP+NES. GFP and DAPI staining was captured to demonstrate the change in localization of CPY<sup>+</sup>-GFP within the cell in the absence of *sse1*Δ. CPY<sup>+</sup>-GFP accumulates in the nucleus of *san1*Δ cells but is restricted to the cytoplasm in the *sse1*Δ*san1*Δ cells. (B) Quantitation of the mean nuclear signal intensity of GFP fluorescence in the nucleus in *san1*Δ and *sse1*Δ*san1*Δ using ImageJ software, computed as the ratio of DAPI colocalized GFP signal divided by the total GFP signal in the cell. CPY<sup>+</sup>-GFP+NES localization in *san1*Δ cells was used to gauge the lower limits of detection. Error bars are SEM (*n* = 25 in each condition).

**Table S1. *Saccharomyces cerevisiae* strains used in these studies, with RHY designation, relevant markers, plasmids, and origin of strains\***

| Name    | Genotype                                                                                                                                             | Source                     |
|---------|------------------------------------------------------------------------------------------------------------------------------------------------------|----------------------------|
| BY4741  | <i>MATa ura3Δ0 leu2Δ0 his3Δ1 met15Δ0</i>                                                                                                             | Resgen Deletion Collection |
| RHY4622 | JN516; <i>MATα ura3–52 leu2–3 his3–11, 15 trp1Δ1 lys2 SSA1 ssa2::LEU2 ssa3::TRP1 ssa4::LYS2</i>                                                      | Jeff Brodsky               |
| RHY4623 | JB67; <i>MATα ura3–52 leu2–3 his3–11, 15 trp1Δ1 lys2 ssa1::ssa1–45 ssa2::LEU2 ssa3::TRP1 ssa4::LYS2</i>                                              | Jeff Brodsky               |
| RHY6336 | BY4741 pRH2081 ( <i>P<sub>TDH3</sub>-CPY<sup>+</sup>-GFP, URA3</i> )                                                                                 | This study                 |
| RHY6337 | BY4741 <i>sti1Δ::KanMX</i> pRH2081 ( <i>P<sub>TDH3</sub>-CPY<sup>+</sup>-GFP, ADE2 URA3</i> )                                                        | This study                 |
| RHY6338 | BY4741 <i>sse1Δ::KanMX</i> pRH2081 ( <i>P<sub>TDH3</sub>-CPY<sup>+</sup>-GFP, ADE2 URA3</i> )                                                        | This study                 |
| RHY6364 | <i>MATα ade2–101 met2 lys2–801 ura3–52 trp1::hisG leu2Δ his2Δ200 CDC34::cdc34–2</i><br>pRH2047 ( <i>P<sub>TDH3</sub>-CPY<sup>+</sup>-GFP, URA3</i> ) |                            |
| RHY7135 | BY4741 <i>ubr1Δ::KanMX</i> pRH2081 ( <i>P<sub>TDH3</sub>-CPY<sup>+</sup>-GFP, ADE2 URA3</i> )                                                        | This study                 |
| RHY7136 | BY4741 <i>san1Δ::NatMX ubr1Δ::KanMX</i> pRH2081 ( <i>P<sub>TDH3</sub>-CPY<sup>+</sup>-GFP, ADE2 URA3</i> )                                           | This study                 |
| RHY7157 | BY4741 <i>san1Δ::NatMX</i> pRH2081 ( <i>P<sub>TDH3</sub>-CPY<sup>+</sup>-GFP, ADE2 URA3</i> )                                                        | This study                 |
| RHY7161 | BY4741 <i>san1Δ::NatMX ubr1Δ::KanMX</i> pRH2081 ( <i>P<sub>TDH3</sub>-CPY<sup>+</sup>-GFP, ADE2 URA3</i> )<br>pRH2439 [ <i>San1(-NLS)-3HSV</i> ]     | This study                 |
| RHY7165 | RHY7136 pRH2444 ( <i>UBR1, LEU2, YCp</i> )                                                                                                           | This study                 |
| RHY7169 | RHY7136 pRH2445 ( <i>UBR1MR1, LEU2, YCp</i> )                                                                                                        | This study                 |
| RHY7447 | BY4741                                                                                                                                               | Resgen Deletion Collection |
| RHY7448 | BY4741 <i>san1Δ::NatMX</i>                                                                                                                           | This study                 |
| RHY7449 | BY4741 <i>ubr1Δ::KanMX</i>                                                                                                                           | Resgen Deletion Collection |
| RHY7450 | BY4741 <i>san1Δ::NatMX ubr1Δ::KanMX</i>                                                                                                              | This study                 |
| RHY7616 | RHY7447 pRH2460 ( <i>tFAS1–3HA, URA3, 2μ</i> )                                                                                                       | This study                 |
| RHY7617 | RHY7448 pRH2460 ( <i>tFAS1–3HA, URA3, 2μ</i> )                                                                                                       | This study                 |
| RHY7617 | RHY7449 pRH2460 ( <i>tFAS1–3HA, URA3, 2μ</i> )                                                                                                       | This study                 |
| RHY7618 | RHY7450 pRH2460 ( <i>tFAS1–3HA, URA3, 2μ</i> )                                                                                                       | This study                 |
| RHY7620 | RHY7447 pRH2476 ( <i>P<sub>TDH3</sub>-3HA-tGnd1-GFP ADE2 URA3</i> )                                                                                  | This study                 |
| RHY7621 | RHY7448 pRH2476 ( <i>P<sub>TDH3</sub>-3HA-tGnd1-GFP ADE2 URA3</i> )                                                                                  | This study                 |
| RHY7622 | RHY7449 pRH2476 ( <i>P<sub>TDH3</sub>-3HA-tGnd1-GFP ADE2 URA3</i> )                                                                                  | This study                 |
| RHY7623 | RHY7450 pRH2476 ( <i>P<sub>TDH3</sub>-3HA-tGnd1-GFP ADE2 URA3</i> )                                                                                  | This study                 |
| RHY7630 | BY4741 <i>pdr5Δ::KanMX</i> pRH2081 ( <i>P<sub>TDH3</sub>-CPY<sup>+</sup>-GFP, ADE2 URA3</i> )                                                        | This study                 |
| RHY7782 | RHY7447 pRH2486 ( <i>P<sub>TDH3</sub>-FLAG-tGnd1-GFP, ADE2 URA3</i> )                                                                                | This study                 |
| RHY7783 | RHY7448 pRH2486 ( <i>P<sub>TDH3</sub>-FLAG-tGnd1-GFP, ADE2 URA3</i> )                                                                                | This study                 |
| RHY7784 | RHY7449 pRH2486 ( <i>P<sub>TDH3</sub>-FLAG-tGnd1-GFP, ADE2 URA3</i> )                                                                                | This study                 |
| RHY7785 | RHY7450 pRH2486 ( <i>P<sub>TDH3</sub>-FLAG-tGnd1-GFP, ADE2 URA3</i> )                                                                                | This study                 |
| RHY7873 | RHY7447 pRH2491 ( <i>P<sub>TDH3</sub>-3HAtYor296w, ADE2 URA3</i> )                                                                                   | This study                 |
| RHY7874 | RHY7448 pRH2491 ( <i>P<sub>TDH3</sub>-3HAtYor296w, ADE2 URA3</i> )                                                                                   | This study                 |
| RHY7875 | RHY7449 pRH2491 ( <i>P<sub>TDH3</sub>-3HAtYor296w, ADE2 URA3</i> )                                                                                   | This study                 |
| RHY7876 | RHY7450 pRH2491 ( <i>P<sub>TDH3</sub>-3HAtYor296w, ADE2 URA3</i> )                                                                                   | This study                 |
| RHY7878 | BY4741 <i>sse1Δ::KanMX san1Δ::NatMx</i>                                                                                                              | This study                 |
| RHY7983 | RHY7878 pRH2474 ( <i>P<sub>ADH1</sub>, LEU2, 2μ</i> )                                                                                                | This study                 |
| RHY7984 | RHY7878 pRH2471 ( <i>P<sub>ADH1</sub>-UBR1, LEU2, 2μ</i> )                                                                                           | This study                 |
| RHY7987 | RHY7447 pRH2516 ( <i>P<sub>TDH3</sub>-3HA-stGnd1 ADE2 URA3</i> )                                                                                     | This study                 |
| RHY7988 | RHY7448 pRH2516 ( <i>P<sub>TDH3</sub>-3HA-stGnd1 ADE2 URA3</i> )                                                                                     | This study                 |
| RHY7989 | RHY7449 pRH2516 ( <i>P<sub>TDH3</sub>-3HA-stGnd1 ADE2 URA3</i> )                                                                                     | This study                 |
| RHY7990 | RHY7450 pRH2516 ( <i>P<sub>TDH3</sub>-3HA-stGnd1 ADE2 URA3</i> )                                                                                     | This study                 |
| RHY7993 | BY4741 <i>ydj1Δ::Leu2</i> pRH2081 ( <i>P<sub>TDH3</sub>-CPY<sup>+</sup>-GFP, ADE2 URA3</i> )                                                         | This study                 |
| RHY7994 | BY4741 <i>hsp104Δ::Leu2</i> pRH2081 ( <i>P<sub>TDH3</sub>-CPY<sup>+</sup>-GFP, ADE2 URA3</i> )                                                       | This study                 |
| RHY8075 | BY4741 <i>sse1Δ::KanMX</i>                                                                                                                           | Resgen Deletion Collection |
| RHY8198 | RHY7447 pRH2531 ( <i>P<sub>TDH3</sub>-3HA-Gnd1-GFP ADE2 URA3</i> )                                                                                   | This study                 |
| RHY8199 | RHY7448 pRH2531 ( <i>P<sub>TDH3</sub>-3HA-Gnd1-GFP ADE2 URA3</i> )                                                                                   | This study                 |
| RHY8200 | RHY7449 pRH2531 ( <i>P<sub>TDH3</sub>-3HA-Gnd1-GFP ADE2 URA3</i> )                                                                                   | This study                 |
| RHY8201 | RHY7450 pRH2531 ( <i>P<sub>TDH3</sub>-3HA-Gnd1-GFP ADE2 URA3</i> )                                                                                   | This study                 |
| RHY8308 | RHY7450 pRH2471 ( <i>P<sub>ADH1</sub>-UBR1, LEU2, 2μ</i> )                                                                                           | This study                 |
| RHY8309 | RHY7450 pRH2439 ( <i>SAN1-NLS, LEU2</i> )                                                                                                            | This study                 |
| RHY8368 | BY4741 <i>sse1Δ::KanMX ubr1Δ::LEU2</i>                                                                                                               | This study                 |

\*When requesting, please refer to the strain or plasmid number.
